# Supplementary material for: Preliminary Estimates of Years of Life Lost (YLL) Due to COVID-19 in India
Source: medRxiv preprint, doi:10.1101/2020.10.24.20218693, version 3 (2020-11-30)
Supplement: Figures 1S and 2S in the Supplement [file 218693_file02.docx]

**Preliminary Estimates of Years of Life Lost (YLL) Due to COVID-19 in India**

**SUPPLEMENT**

The following two figures provide visual comparison of the age distribution of COVID cases, COVID deaths, general population and deaths in the general population.

Figure 1S. Age distribution of COVID cases in India in comparison to the age distribution in the general population

Figure 2S. Age distribution of COVID deaths in India in comparison to the age distribution of all deaths in the general population
